# Supplementary figures and images for: Assessing Genomic Diversity and Selective Pressures in Bohai Black Cattle Using Whole-Genome Sequencing Data
Source: MDPI journal article supplement (doi:10.3390/ani12050665), 2022-03-07

(a)

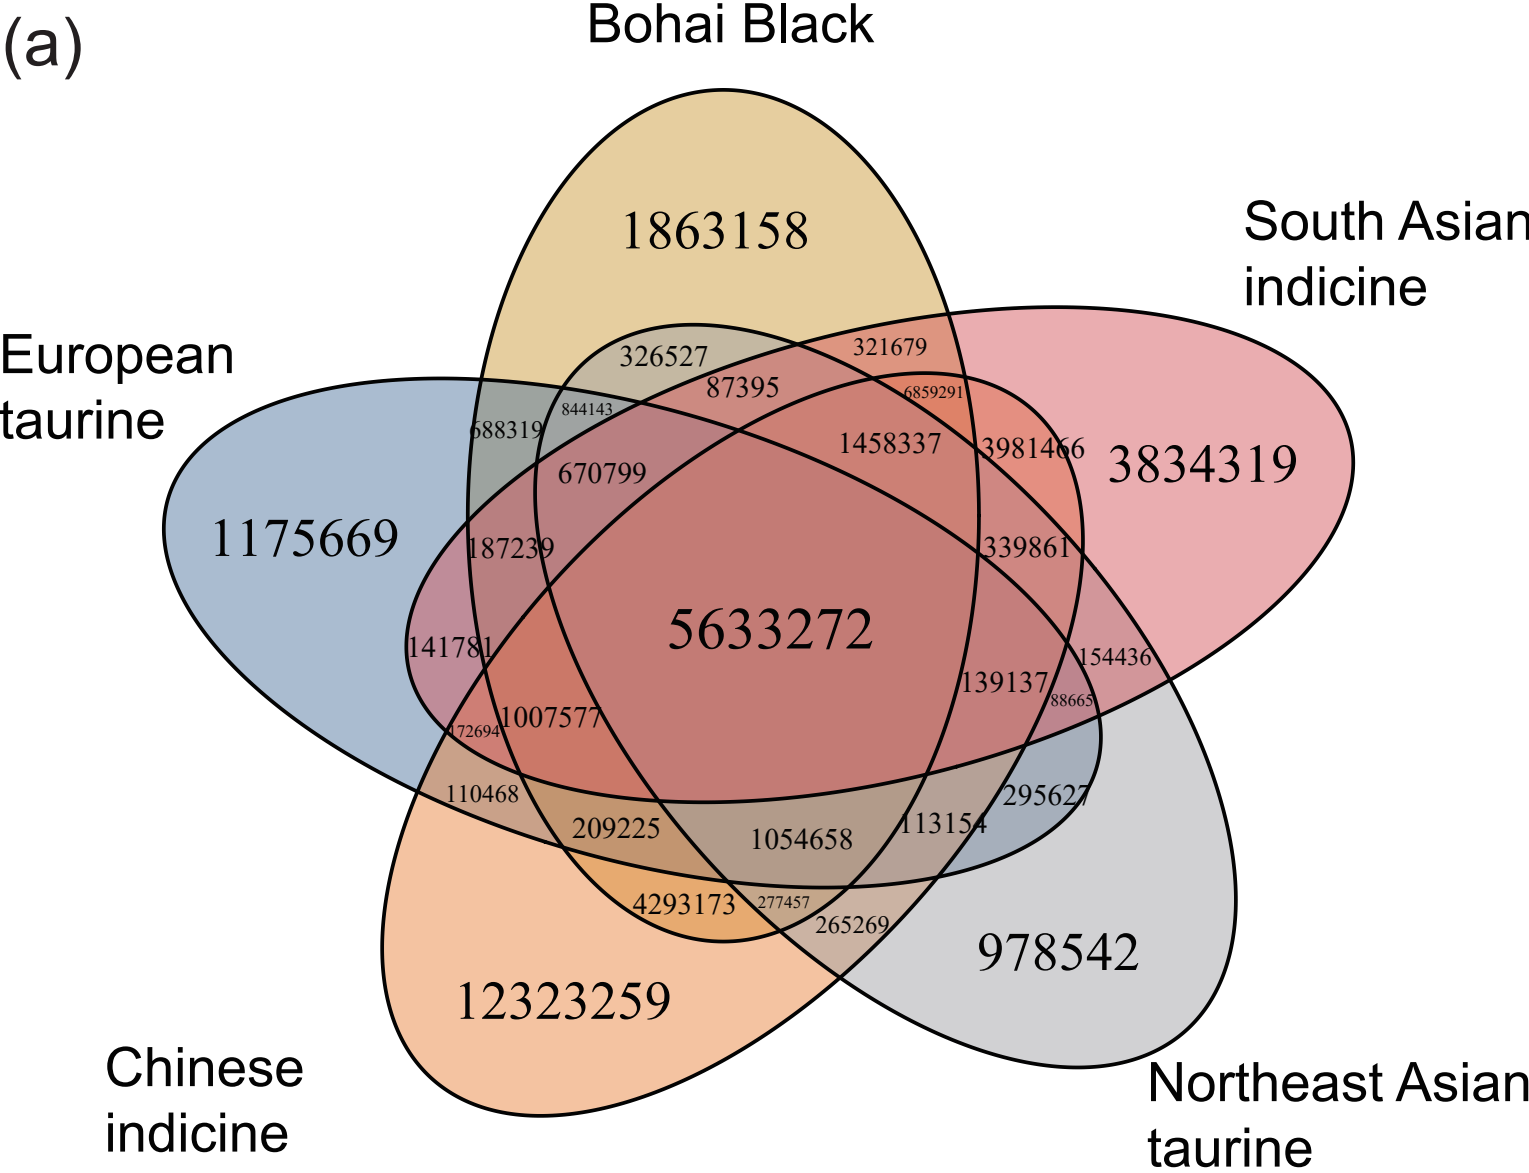

(b)

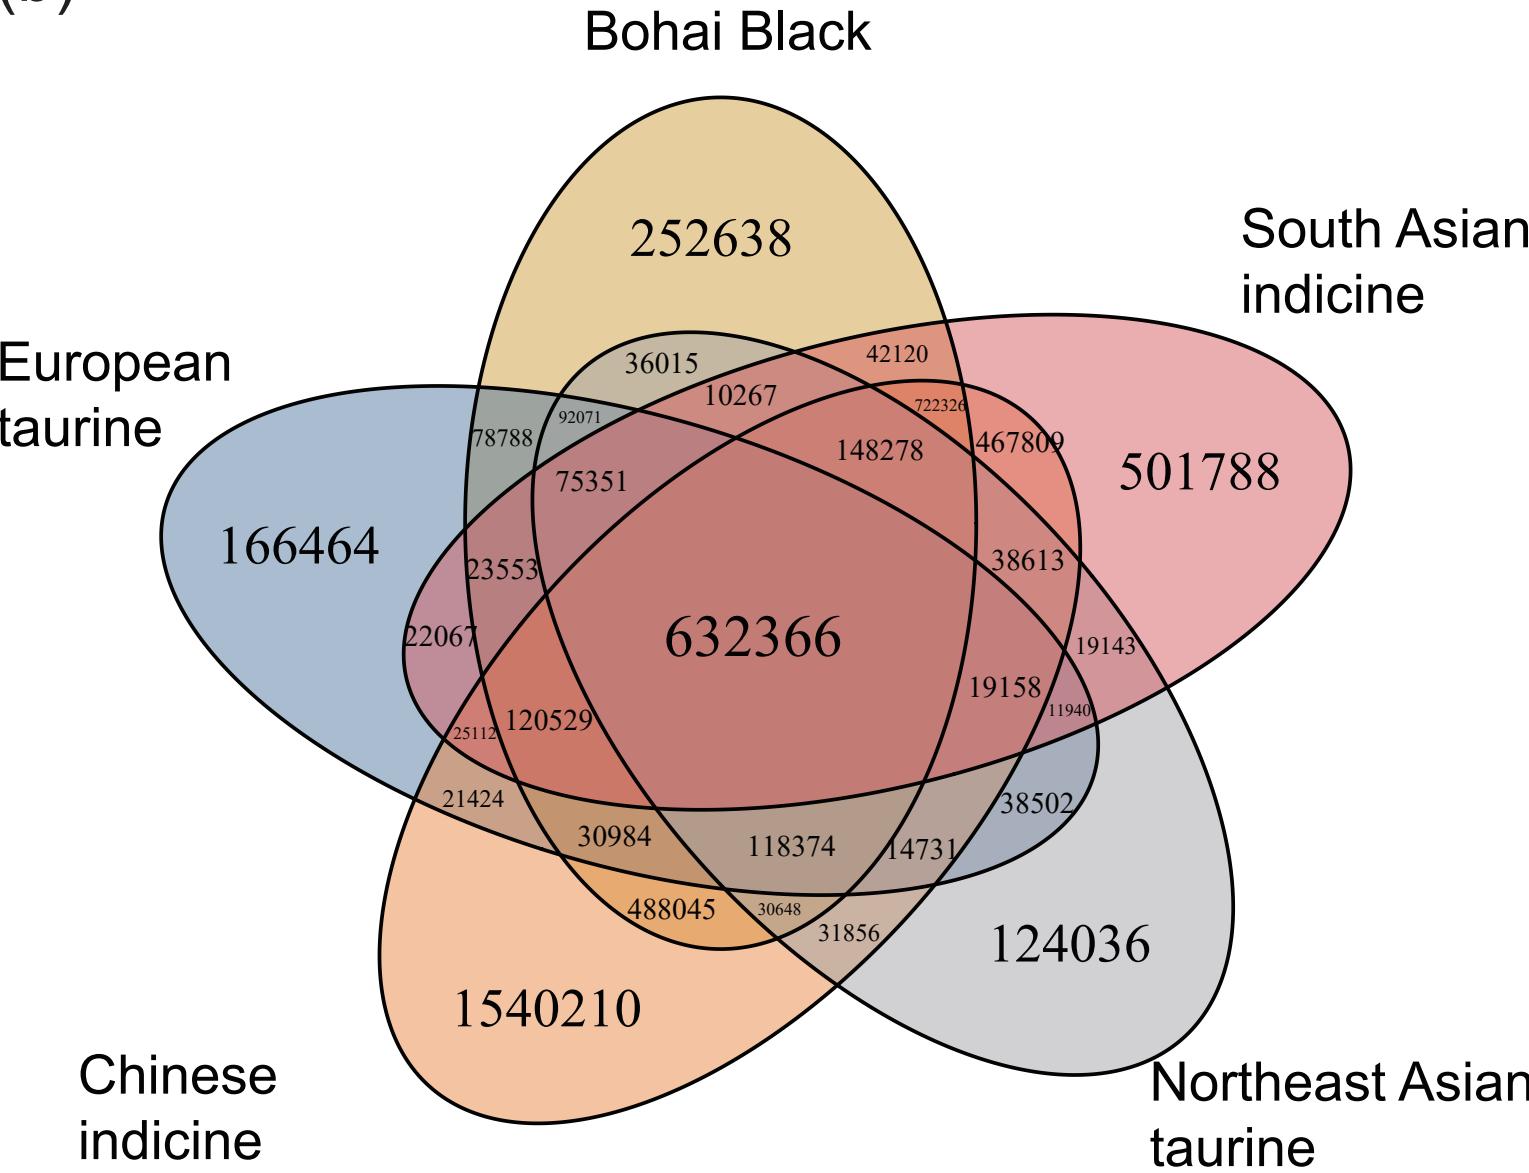

Supplement: s1 [file s1]
